# Supplementary material for: Cooperative regulation of PBI1 and MAPKs controls WRKY45 transcription factor in rice immunity
Source: PubMed Central journal article supplement (PMC9110426; doi:10.1038/s41467-022-30131-y), 2022-05-16
Supplement: 41467_2022_30131_MOESM1_ESM.pdf [file 41467_2022_30131_MOESM1_ESM.pdf]

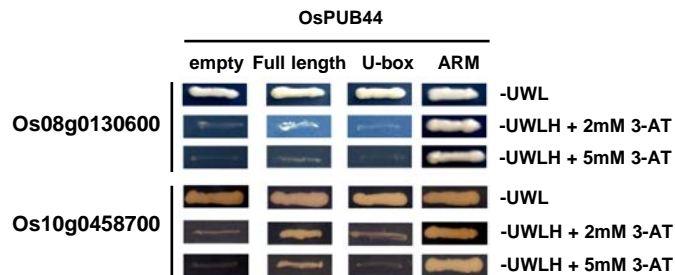

**Supplementary Figure 1: Rice factors identified by two hybrid screening.**

Two rice proteins were identified by two hybrid screening with the ARM domain of PUB44. Growth of yeast colonies on –ULWH plates with 2 mM or 5 mM 3-aminotriazole (3-AT) indicates a positive interaction. The experiment was repeated three times with similar results.

```

PBI1 MAEEAWRSRFRERVVEAAERWESVGESLAT-ALHLKSPMHAGDEEEAAAARTRIQLAMG 59
PBI2 MAEEAWRARFRERVVEAAGRWERVREGLAT-ALAHVTSPMLAADEEEAAAARTRIQLAMG 59
PBI3 MAEEAWRERFRQRVAEVDLDFVEAFELLVDNARITHLEAQMLVGD--AAAAERARIQLAGG 58
PBI4 -----MRTPCeirSSRWTRS-----ASGMRARAAISPP 29
      .      :      *:.*.*  ::

PBI1 ELVDASRNLASAMSLMKVAELLALHGGSVNPSTHLGETISLLGDQYLAERNAGIKLLEAGK 119
PBI2 QLEDASRDLASAMSLMKAADLLALHGDSVNPSTFLGGIGHLGAQYLAERIAVTKLREAME 119
PBI3 ALEDASGKLASAMSLMVGAKLLVLRGGSHDPLMPYHDIGHLGDEYAAEKNACAKLRGAER 118
PBI4 RFPSRWR-PGSSLAAATASTLLSVR-----LLRVNYLAEQSAAIKLSYAES 74
      : .      .*:.*      : **  ::      *  :* **:* ** *

PBI1 DARKAYISVDGCRGNLDAILLLLDHP-RVPCVDDFIE-EELFVAGDNLQGAIGNAKLGTE 177
PBI2 DARDAYTNVEWCRSHLDAILLMLDHP-HLPSVDGLIE-EDRAAADGFLQAAIGRAELGNE 177
PBI3 EAEAEACARIGMCSGHLETISLLLDHE-NLPGVNDLIENERLDAVDDLLAAIGKVESGKK 177
PBI4 DARKAYALVDGCRGHLDAAILLLLDHVGRLPDVQGMIN-AERLAAVADLEAAIVAVQRSAE 133
      :*.*.*      : *  .*:.*: *:* **  .* * .*:.*  .: . :

PBI1 RAVGARQDVSGAN 190
PBI2 RAVDARQDVSGAN 190
PBI3 MANDARLDVG-AN 189
PBI4 MATAARQDVSGAS 146
      * ** **,*

```

**Supplementary Figure 2: Alignment of amino acid sequences of PBI1 – PBI4.**

The alignment was created using ClustalW on the DNA Data Bank of Japan website (<http://www.ddbj.nig.ac.jp/>).

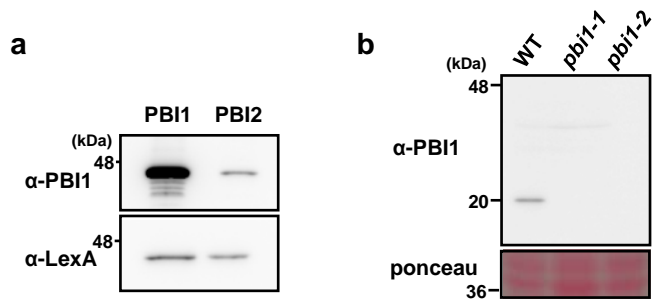

### Supplementary Figure 3: Specificity of $\alpha$ -PBI1

**a** LexA-fused PBI1 and PBI2 proteins were purified from yeast cells and subjected to immunoblots with  $\alpha$ -PBI1 or  $\alpha$ -LexA. **b** Total proteins were purified from suspension cultured cells of wild type and the *pbi1* mutants, and subjected to immunoblots with  $\alpha$ -PBI1. All above experiments were performed three times with similar results.

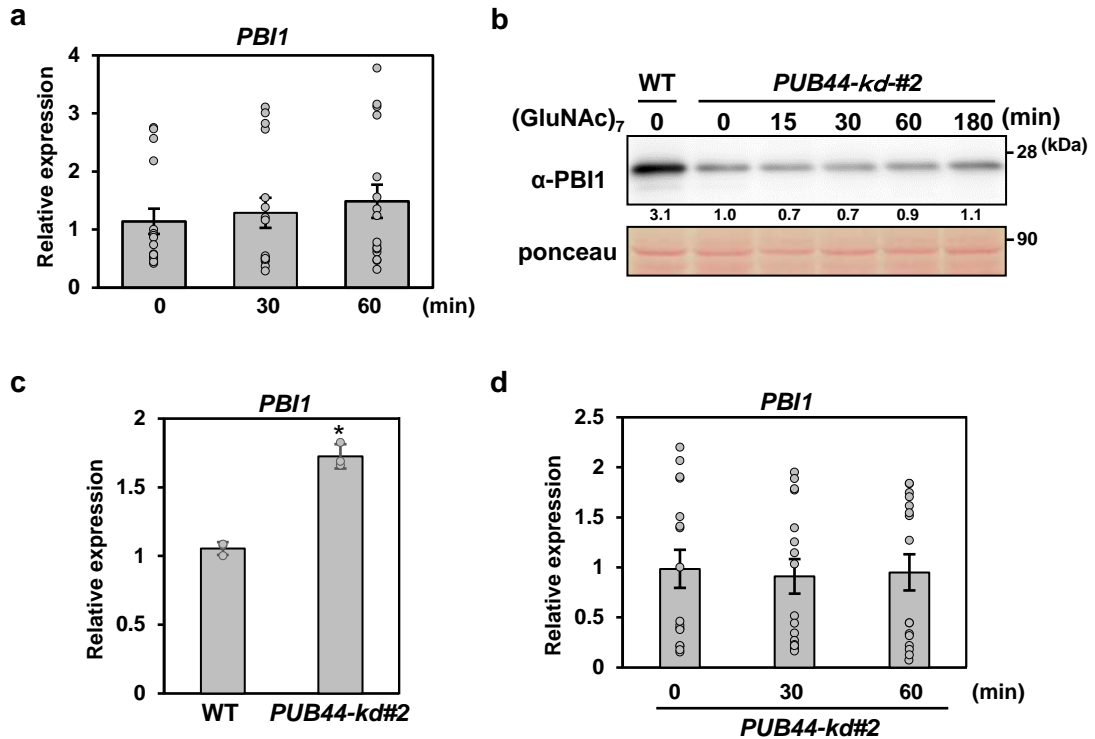

**Supplementary Figure 4: The mRNA and protein levels of PBI1 in wild type and the *PUB44-kd* cell line after treatment of chitin.**

**a** *PBI1* transcript levels in wild type cell treated with 2 μg/ml (GluNAc)<sub>7</sub> were analyzed using quantitative real-time PCR. Data are means ± SE. n=16 biologically independent replicates. **b** The PBI1 protein levels in the *PUB44-kd#2* cell line were determined by immunoblot analysis with α-PBI1 after treatment with 2 μg/ml (GluNAc)<sub>7</sub>. The relative abundance of the PBI1 proteins detected is labeled under the blot with α-PBI1. **c** *PBI1* transcript levels in wild type and *PUB44-kd#2* cell line were analyzed using quantitative real-time PCR. Data are means ± SD. n=3 biologically independent replicates. The asterisk indicates statistically significant differences from the WT control by Two-sided Student's t-test (P < 0.05). **d** *PBI1* transcript levels in *PUB44-kd#2* cell line treated with 2 μg/ml (GluNAc)<sub>7</sub> were analyzed using quantitative real-time PCR. Data are means ± SE. n=16 biologically independent replicates. All above experiments were repeated three times with similar results.

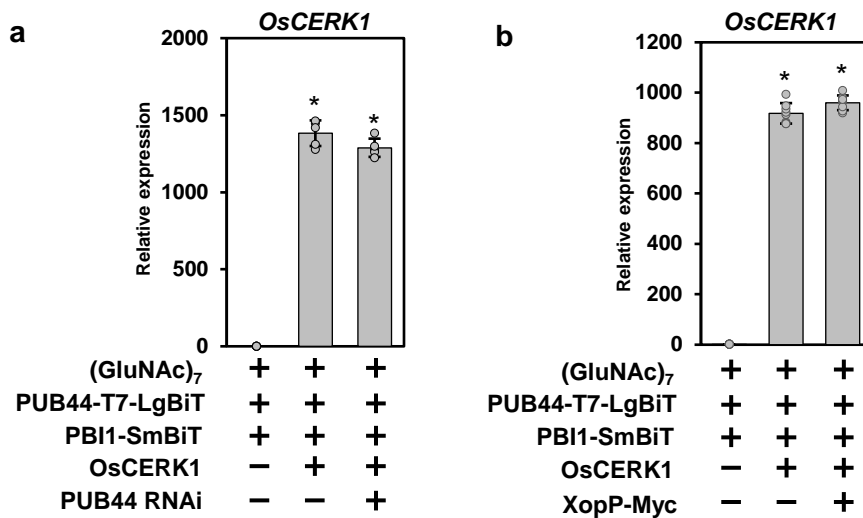

**Supplementary Figure 5: The mRNA levels of *OsCERK1* in transient assay**

**a** The mRNA levels of *OsCERK1* in Fig. 2e were analyzed using quantitative real-time PCR. Data are means  $\pm$ SD. n=5 biologically independent replicates. The asterisk indicates statistically significant differences from the protoplasts that did not carry the *OsCERK1* construct by two-sided Mann-Whitney's U test ( $P < 0.01$ ). **b** The mRNA levels of *OsCERK1* in Fig. 2i were analyzed using quantitative real-time PCR. Data are means  $\pm$ SD. n=8 biologically independent replicates. The asterisk indicates statistically significant differences from the protoplasts that did not carry the *OsCERK1* construct by two-sided Mann-Whitney's U test ( $P < 0.01$ ). All above experiments were performed three times with similar results.

PBI1

potato Rx-CC domain

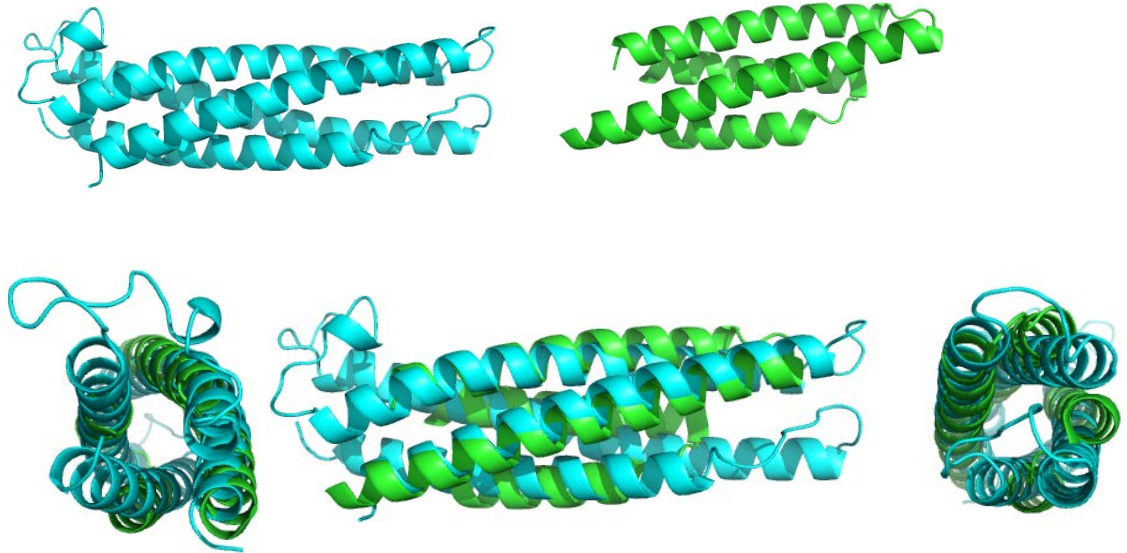

**Supplementary Figure 6: Structural alignment of Rx CC domain and PBI1.**

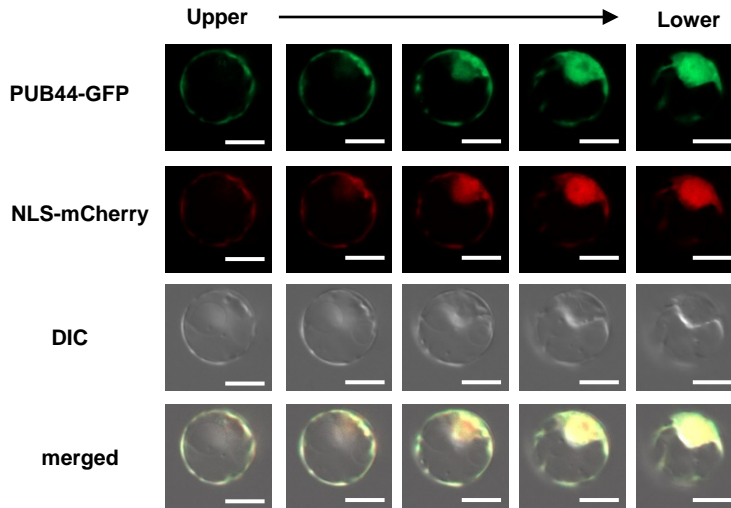

**Supplementary Figure 7: Subcellular localization of PUB44-GFP in rice protoplasts.**

PUB44-GFP was transiently expressed in rice protoplasts. mCherry with a nuclear localization signal was used as a nuclear localization marker. The fluorescence was observed using a fluorescence microscope, the Axio Imager M2 (Carl Zeiss) with the ApoTome2 system (Carl Zeiss). The section thickness is 1.14  $\mu\text{m}$ . Scale bar=10 $\mu\text{m}$ . The experiment was performed three times with similar results.

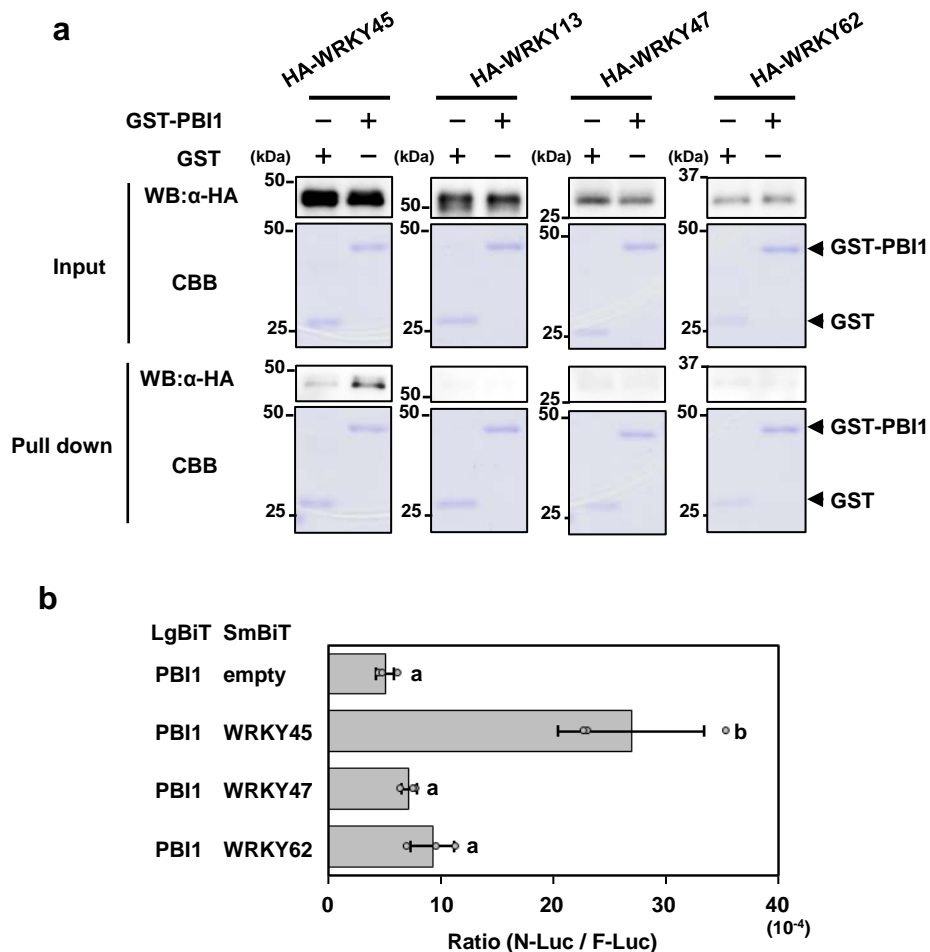

### Supplementary Figure 8: PBI1 interacts with WRKY45 but not other WRKYs.

**a** *In vitro* interaction between PBI1 and WRKYs. GST and GST-fused PBI1 proteins coupled to glutathione Sepharose 4B beads were incubated with HA-tagged WRKY45, HA-WRKY13, HA-WRKY47 and HA-WRKY62. After washing with the buffer containing 0.1 % Triton-X, the proteins were eluted with 40mM glutathione. HA-WRKYs were detected with immunoblotting with  $\alpha$ -HA. The GST and GST-fused PBI1 proteins were detected by Coomassie brilliant blue (CBB) staining. **b** The interactions between PBI1 and WRKYs were analyzed using split NanoLuc luciferase complementation assays. PBI1 was fused to LgBiT, and WRKYs were fused to SmBiT. F-Luc was used as an internal control. Rice protoplasts were transfected with the constructs and the interactions were indicated by the N-Luc to F-Luc ratios. Different letters above the data points indicate significant differences ( $p < 0.01$ , Two-sided Student's *t*-test). Data are means  $\pm$ SD.  $n=3$  biologically independent replicates. All above experiments were repeated three times with similar results.



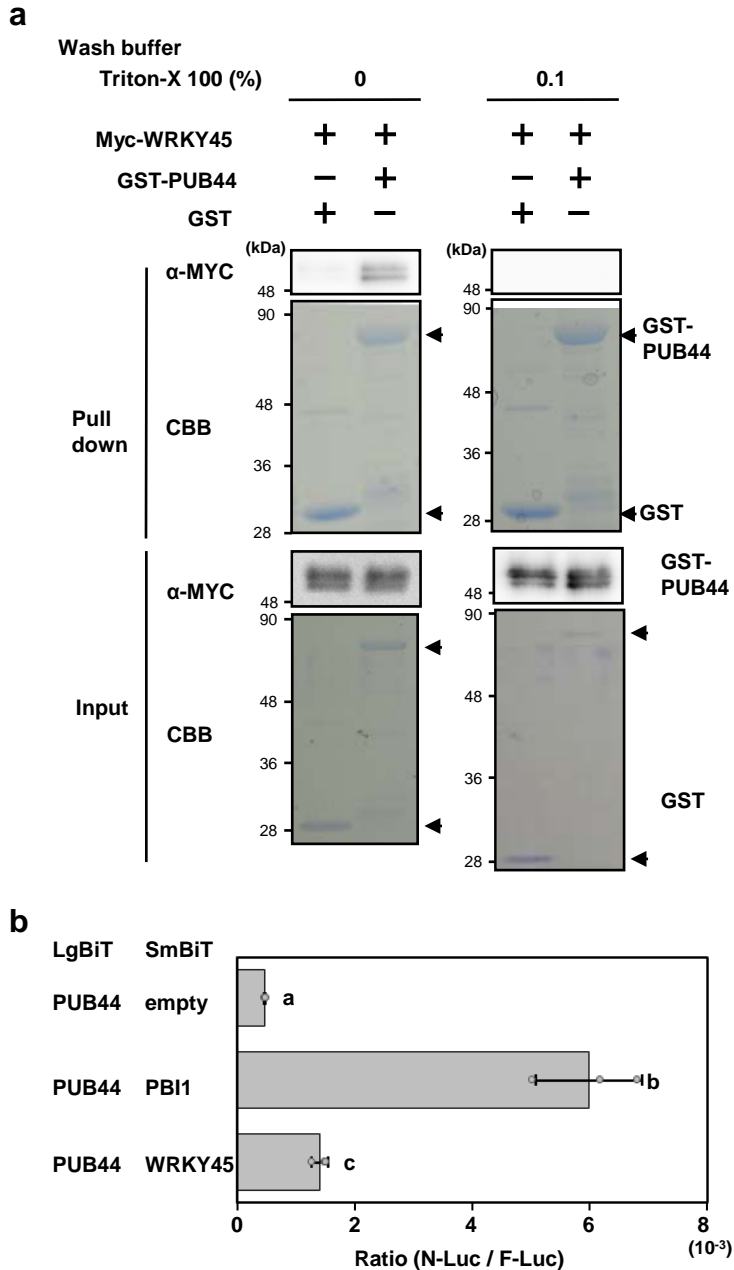

**Supplementary Figure 9: PUB44 weakly interacts with WRKY45.**

**a** *In vitro* interaction between PUB44 and WRKY45. GST and GST-fused PUB44 proteins coupled to glutathione Sepharose 4B beads were incubated with Myc-tagged WRKY45 in buffer A (20 mM Tris pH7.5, 50 mM NaCl, 1mM EDTA, 1mM DTT and protease inhibitor) for 2h at 4° C. After washing with buffer A containing 0 % or 0.1 % Triton-X 100, the proteins were eluted with 30mM glutathione. Myc-WRKYs were detected with immunoblotting with  $\alpha$ -Myc. The GST and GST-fused PUB44 proteins were detected by Coomassie brilliant blue (CBB) staining of the gel. The interaction between PUB44 and WRKY45 was lost by washing with buffer A containing 0.1% Triton-X 100. **b** The interactions between PUB44 and WRKY45 or PBI1 were analyzed using split NanoLuc luciferase complementation assays. PUB44 was fused to LgBiT, and WRKY45 and PBI1 were fused to SmBiT. F-Luc was used as an internal control. Rice protoplasts were transfected with the constructs and the interactions were indicated by the N-Luc to F-Luc ratios. Data are means  $\pm$ SD. n=3 biologically independent replicates. Different letters above the data points indicate significant differences ( $p < 0.01$ , Two-sided Student's *t*-test). All above experiments were performed three times with similar results.

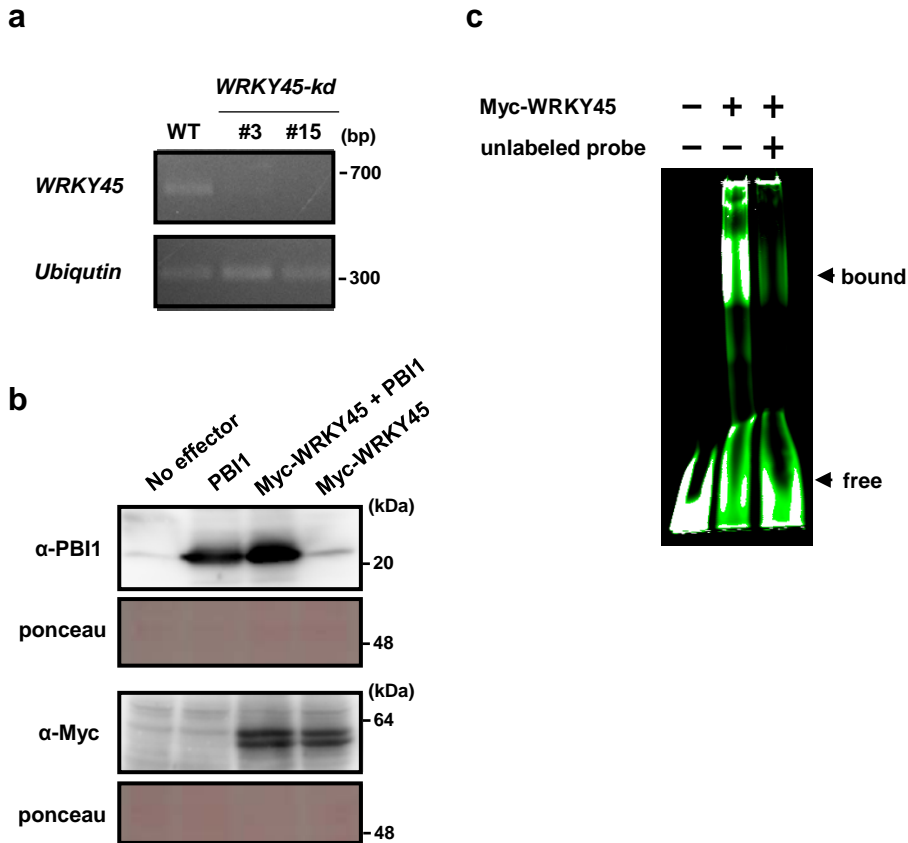

### Supplementary Figure 10: PBI1 inhibits WRKY45.

**a** Transcript levels of *WRKY45* in the suspension cells of the *WRKY45-kd* lines. Semi-quantitative RT-PCR was carried out using specific primers of *WRKY45*. *Ubiquitin* was used as a control. **b** The protein levels of WRKY45-myc and PBI1 in transient Luc assay. Total proteins prepared from the protoplasts transiently expressing WRKY45-myc and PBI1 were subjected to immunoblotting. **c** EMSA was performed using WRKY45 prepared by *in vitro* translation system. Probe containing W-box was labeled by IRDye700. The specificity of W-box binding activity was demonstrated by competition assay using 50-fold excess unlabeled probe. All above experiments were performed three times with similar results.

**a**

|                      |                                                        |    |    |    |    |    |
|----------------------|--------------------------------------------------------|----|----|----|----|----|
|                      | 1                                                      | 10 | 20 | 30 | 40 | 50 |
| <b>WT</b>            | ATGGCGGCGGAGGCGTGGAGATCGCGGTTCCGGGAGCGTGTGGTGGAGGCGGCG |    |    |    |    |    |
|                      | M A A E A W R S R F R E R V V E A A                    |    |    |    |    |    |
| <b><i>pbi1-1</i></b> | ATGGCGGCGGAGGCGTGGAG--CGCGGTTCCGGGAGCGTGTGGTGGAGGCGGCG |    |    |    |    |    |
|                      | M A A E A W S A V P G A C G G G G                      |    |    |    |    |    |
|                      | (2bp deletion + frameshift)                            |    |    |    |    |    |
| <b><i>pbi1-2</i></b> | ATGGCGGCGGAGGCGT-----TGCGGTTCCGGGAGCGTGTGGTGGAGGCGGCG  |    |    |    |    |    |
|                      | M A A E A L R F R E R V V E A A                        |    |    |    |    |    |
|                      | (6bp deletion+ 1bp substitution(C→T))                  |    |    |    |    |    |

**b**

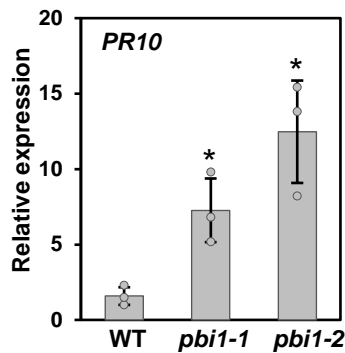

**c**

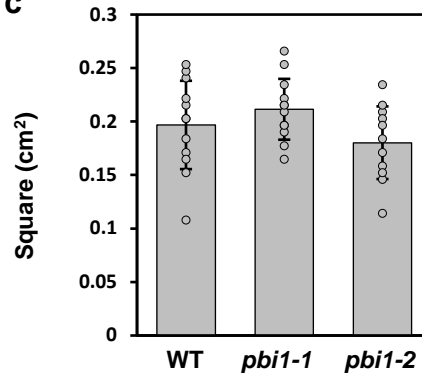

**Supplementary Figure 11: Rice blast resistance of the *pbi1* mutants.**

**a** The mutation sites of the *pbi1-1* and *pbi1-2* mutants. **b** Transcript levels of *PR10* in the suspension cells of the *pbi1* mutants. Quantitative real time PCR was carried out using specific primers of *PR10*. *Ubiquitin* was used as a control. Data are means  $\pm$ SE. n=3 biologically independent replicates. The asterisks indicate statistically significant differences from the WT control by Two-sided Student's t-test ( $P < 0.05$ ). **c** The *pbi1* mutants were infected with the compatible *Magnaporthe oryzae* race ken53-33. Quantitative analysis of disease lesions was performed at 10 days post inoculation. Data are means  $\pm$ SE. n=12 biologically independent samples. The experiments in (b) were repeated three times, and (c) twice with similar results.

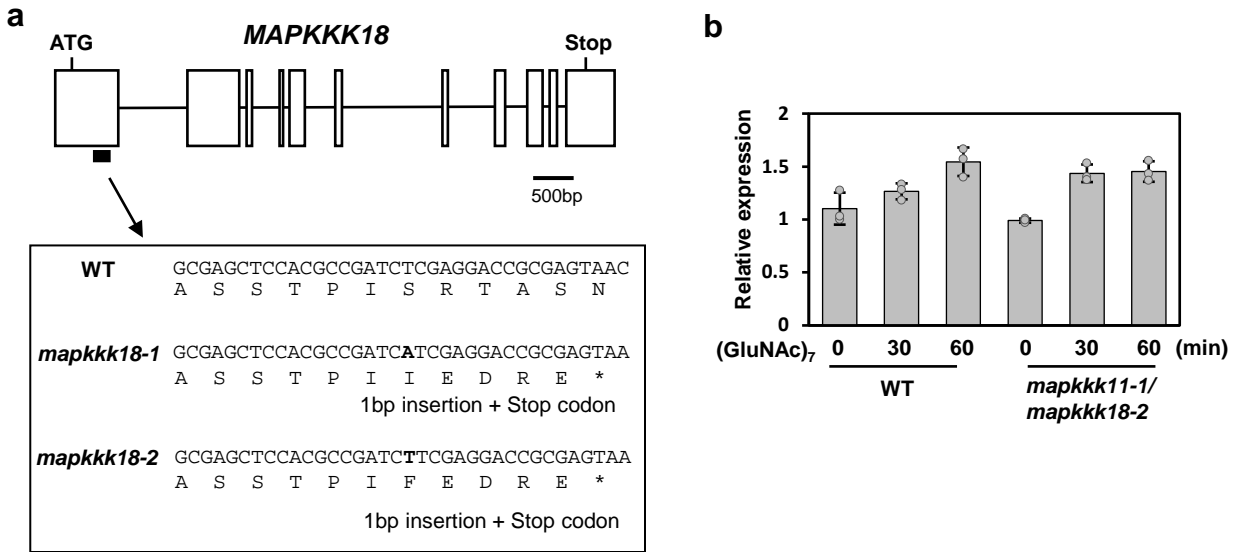

**Supplementary Figure 12: *PBI1* expression in the *mapkkk11/18* mutant.**

**a** The mutation sites of *mapkkk18-1* and *mapkkk18-2*. Both mutations contain 1 bp-insertion in the exon1, and create the stop codon. The stop codon was indicated by asterisk **b** *PBI1* transcript levels in the *mapkkk11/18* cells treated with 2 µg/ml (GluNAc)<sub>7</sub> were analyzed using quantitative real-time PCR. Data are means ±SD. n=3 biologically independent replicates. Similar results were obtained in three independent experiments.

Supplementary Table1. Data collection, phasing, and refinement statistics of PBI1

|                                                 | Native-PBI1           | SeMet-PBI1            |
|-------------------------------------------------|-----------------------|-----------------------|
| Diffraction source                              | SPring-8, BL44XU      | SPring-8, BL44XU      |
| Wavelength (Å)                                  | 0.9000                | 0.97894               |
| Temperature (K)                                 | 100                   | 100                   |
| Detector                                        | MX300HE               | MX300HE               |
| Crystal-to-detector distance (mm)               | 250                   | 250                   |
| Rotation range per image (°)                    | 0.6                   | 1                     |
| Total rotation range (°)                        | 190                   | 185                   |
| Exposure time per image (s)                     | 1                     | 1                     |
| Space group                                     | $P2_1$                | $P2_1$                |
| $a, b, c$ (Å)                                   | 89.93, 89.78, 107.09  | 90.18, 89.76, 107.92  |
| $\alpha, \beta, \gamma$ (°)                     | 90, 106.6, 90         | 90, 106.7, 90         |
| Resolution range (Å)                            | 50.0-1.84 (1.87-1.84) | 50.0-2.12 (2.16-2.12) |
| Total No. of reflections                        | 570139                | 613163                |
| No. of unique reflections                       | 141131                | 92035                 |
| Completeness (%)                                | 98.0 (97.3)           | 98.0 (97.3)           |
| Redundancy                                      | 4.1 (4.2)             | 4.1 (4.0)             |
| $\langle I \rangle / \langle \sigma(I) \rangle$ | 34.3 (3.7)            | 47.8 (7.0)            |
| $R_{\text{merge}}^*$                            | 0.050 (0.418)         | 0.080 (0.394)         |
| $CC_{1/2}$                                      | 0.918                 | 0.963                 |
| Refinement                                      |                       |                       |
| Overall $B$ factor (Å <sup>2</sup> )            | 29                    |                       |
| $R_{\text{factor}}/R_{\text{free}}^\dagger$     | 0.193/0.224           |                       |
| R.m.s. deviations (length, Å/angle, °)          | 0.011/1.3             |                       |
| Ramachandran plot $^\ddagger$                   |                       |                       |
| favoured/allowed/outlier (%)                    | 99.4/0.6/0            |                       |

Values in parentheses are for highest-resolution shell.

\*  $R_{\text{merge}} = \sum_{hkl} \sum_i |I_i(hkl) - \langle I(hkl) \rangle| / \sum_{hkl} \sum_i I_i(hkl)$ , where  $I_i(hkl)$  is the  $i$ th observed intensity of reflection  $hkl$  and  $\langle I(hkl) \rangle$  is the mean measurement.

$^\dagger R_{\text{factor}} = \sum_{hkl} ||F_{\text{obs}}| - |F_{\text{calc}}|| / \sum_{hkl} |F_{\text{obs}}|$ , where  $F_{\text{obs}}$  and  $F_{\text{calc}}$  are the observed and calculated structure factors, respectively.  $R_{\text{free}} = \sum_{hkl} ||F_{\text{obs}}| - |F_{\text{calc}}|| / \sum_{hkl} |F_{\text{obs}}|$  was calculated from a randomly selected 5% subset of reflections that were not used in the refinement.

$^\ddagger$  Ramachandran plot was calculated using MolProbity Validation.

Supplementary Table2. Primers used in the work

| cDNA amplification |                             |
|--------------------|-----------------------------|
| PBI1 F             | CACCATGGCGGCGGAGGCGTGG      |
| PBI1 R             | TCAGTTGGCGCCGGATACATCC      |
| PBI2 F             | CACCATGGCGGCGGAGGCGTGGAG    |
| PBI2 R             | GAATTCTCAGTTGGCGCCGGATACGTC |
| PBI3 F             | CACCATGGCGGAGGAGGCATGGAG    |
| PBI3 R             | TCAGTTCGCGCCGACATCCAG       |
| PBI4 F             | CACCATGGCGGCGGAGGTGTGGAAG   |
| PBI4 R             | TCACTCTCGGCGTAGCTGAGC       |
| WRKY45 F           | CACCATGACGTCATCGATGTC       |
| WRKY45 R           | TCAAAGCTCAAACCCATAATGTCGTC  |
| PUB44-RNAi-F       | CACCACCGGAGGATGAGGGAGGCAGT  |
| PUB44-RNAi-R       | GCTCGAACGGAAGCAGCATATATA    |

| Real-time PCR |                            |
|---------------|----------------------------|
| PBI1 F        | TTCTCGTGTGGCCATTCCA        |
| PBI1 R        | TCATCGATCAGACGTCACGAA      |
| WRKY45 F      | GACACGGGCCGGGTTAAA         |
| WRKY45 R      | TTTCTGTACACACGCGTGGAA      |
| WRKY62 F      | ACCCCTACCCTAGAGCTTACTTCC   |
| WRKY62 R      | GACCTATCCTCCGCACATCTTT     |
| XopA F        | ATGAAT TCTTTGAACA CACAATTC |
| XopA R        | TTACTGCATC GATGCGCTGT CGCT |
| ubiquitin F   | CACAAGAAGGTGAAGCTCGC       |
| ubiquitin R   | GCCTTCTGGTTGTAGACGTAGG     |
| CERK1 F       | CGCGCTGGCTTCTTCTA          |
| CERK1 R       | AAGAGATCCGCCATGTTGGT       |

| Semi qRT-PCR |                                                   |
|--------------|---------------------------------------------------|
| ubiquitin F  | CACAAGAAGGTGAAGCTCGC                              |
| ubiquitin R  | GCCTTCTGGTTGTAGACGTAGG                            |
| CERK1 F      | GCTCGAGTTC TATAGGAGGA GAAAGGC                     |
| CERK1 R      | GTCTAGACTATCTCCCGGACATTAGGT                       |
| PUB44-F      | GACTGGATCCGGTACATGGACGCGGCGGTGCGCCGGGCAG          |
| PUB44-R      | GGCGGCGTGCAGGTGTATGAGCCGGCGCAGGAGCAGGTTGGGGACGAGG |
| XopP-F       | CACCCATATGATGACGCGGTGTGCGCGCAAATTGAATGG           |
| XopP-R       | CTCGAGTTCGATATTGTCGACCGG                          |

| NanoBit construct |                                         |
|-------------------|-----------------------------------------|
| WRKY45 F-KpnI     | GACTGGATCCGGTACATGACGTCATCGATGTCGCC     |
| WRKY45-174R-XhoI  | CTGGGTCTAGATATCTTCACTCGCCGATGTAGGTGACCC |
| WRKY45-174F-KpnI  | GACTGGATCCGGTACATGCACACCTGCCGGGACCCGGC  |
| WRKY45 R-XhoI     | CTGGGTCTAGATATCTTCAAAGCTCAAACCCATAATG   |

| HA-tagged protein construct |                                                                                                      |
|-----------------------------|------------------------------------------------------------------------------------------------------|
| 1st PCR                     |                                                                                                      |
| HA-F                        | CCACCCACCACCACCAATGGAGTACCCATACGACGT                                                                 |
| pGADT-R                     | TGGGGTACAGGTAGTGTTAG                                                                                 |
| 2nd PCR                     |                                                                                                      |
| SPU                         | GCGTAGCATTAGGTGACACT                                                                                 |
| deSP6E01                    | GGTGACACTATAGAACTCACCTATCTCCCAACACCTAATAACATTCAATCACTCT<br>TTCCACTAACCACCTATCTACATCACCACCCACCACCAATG |
